# Supplementary figures and images for: A Projectile Concussive Impact Model Produces Neuroinflammation in Both Mild and Moderate-Severe Traumatic Brain Injury
Source: MDPI journal article supplement (doi:10.3390/brainsci13040623), 2023-04-06

**Sham**

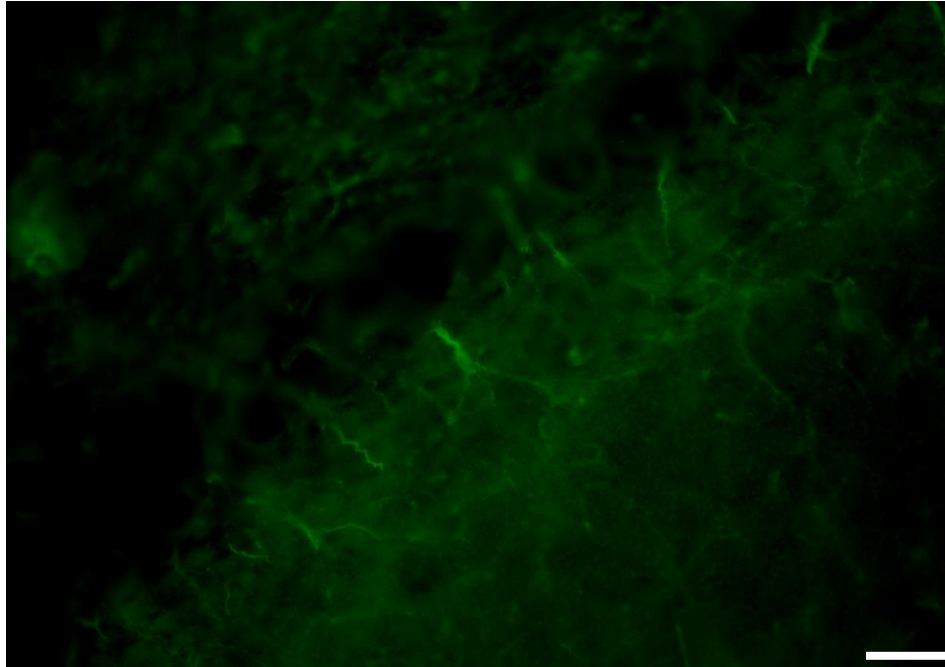

**Aluminum**

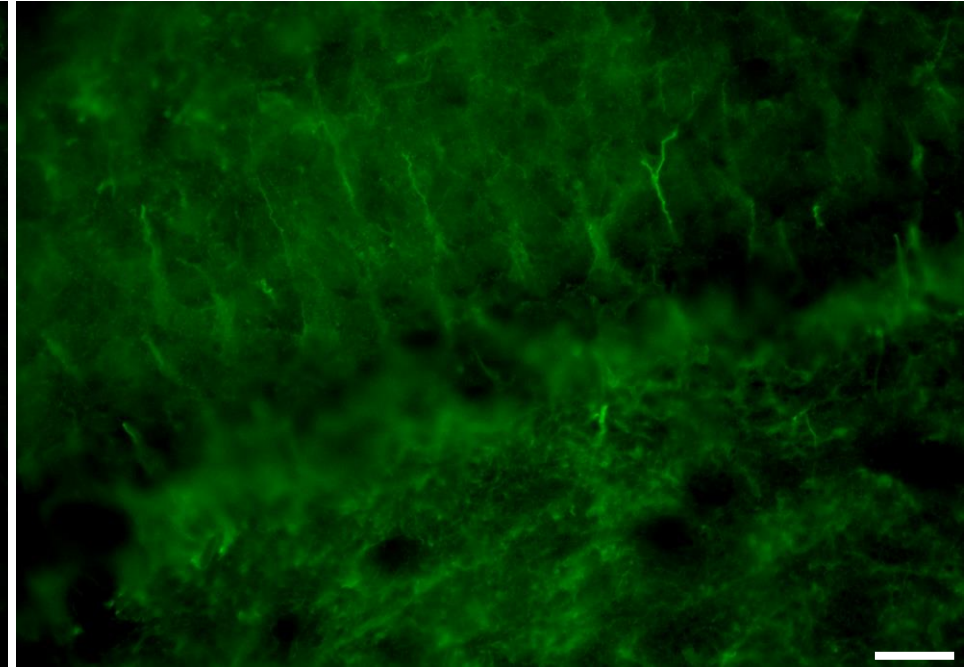

Supplement: s1 [file s1]

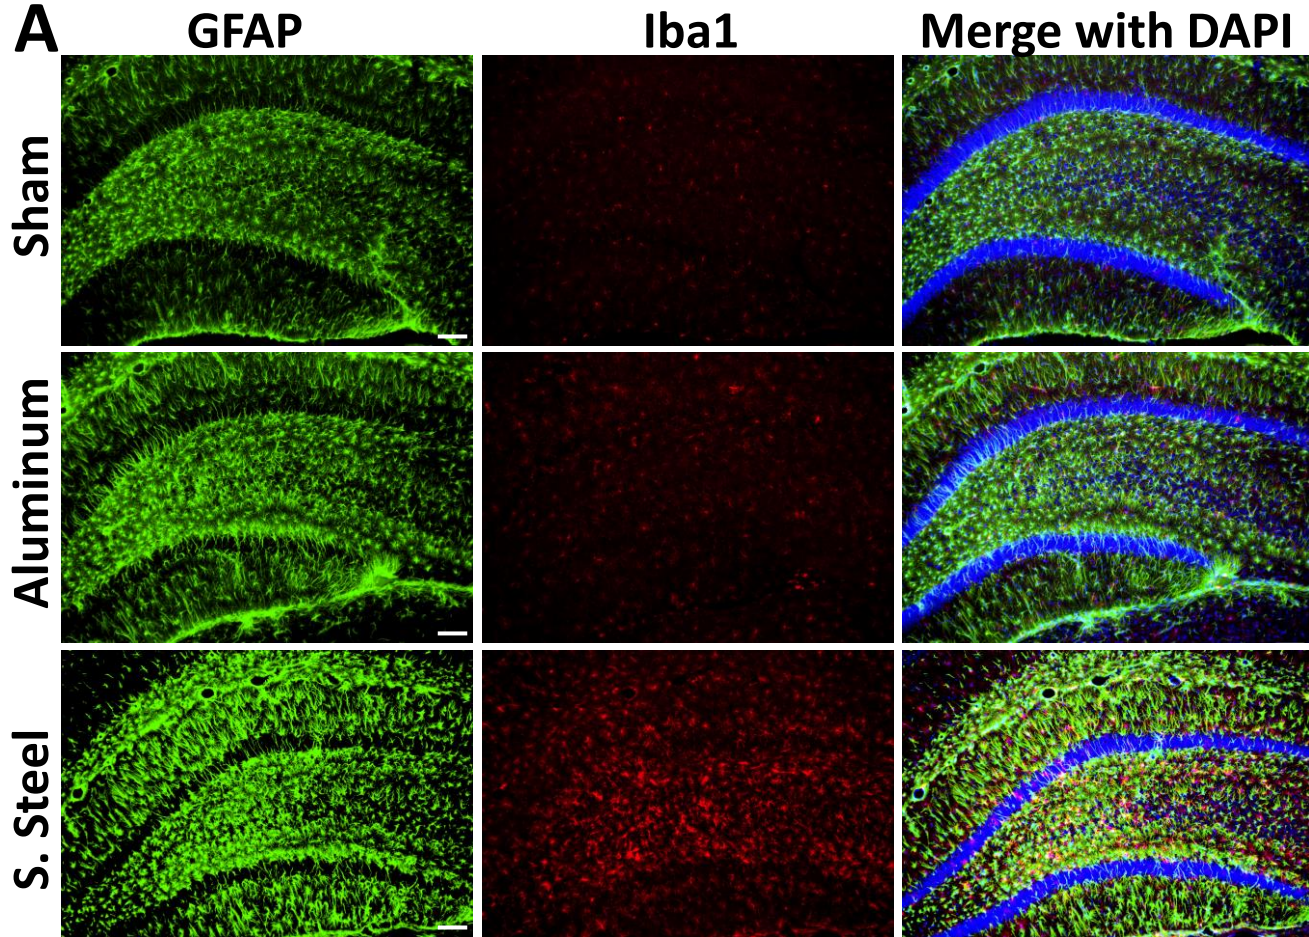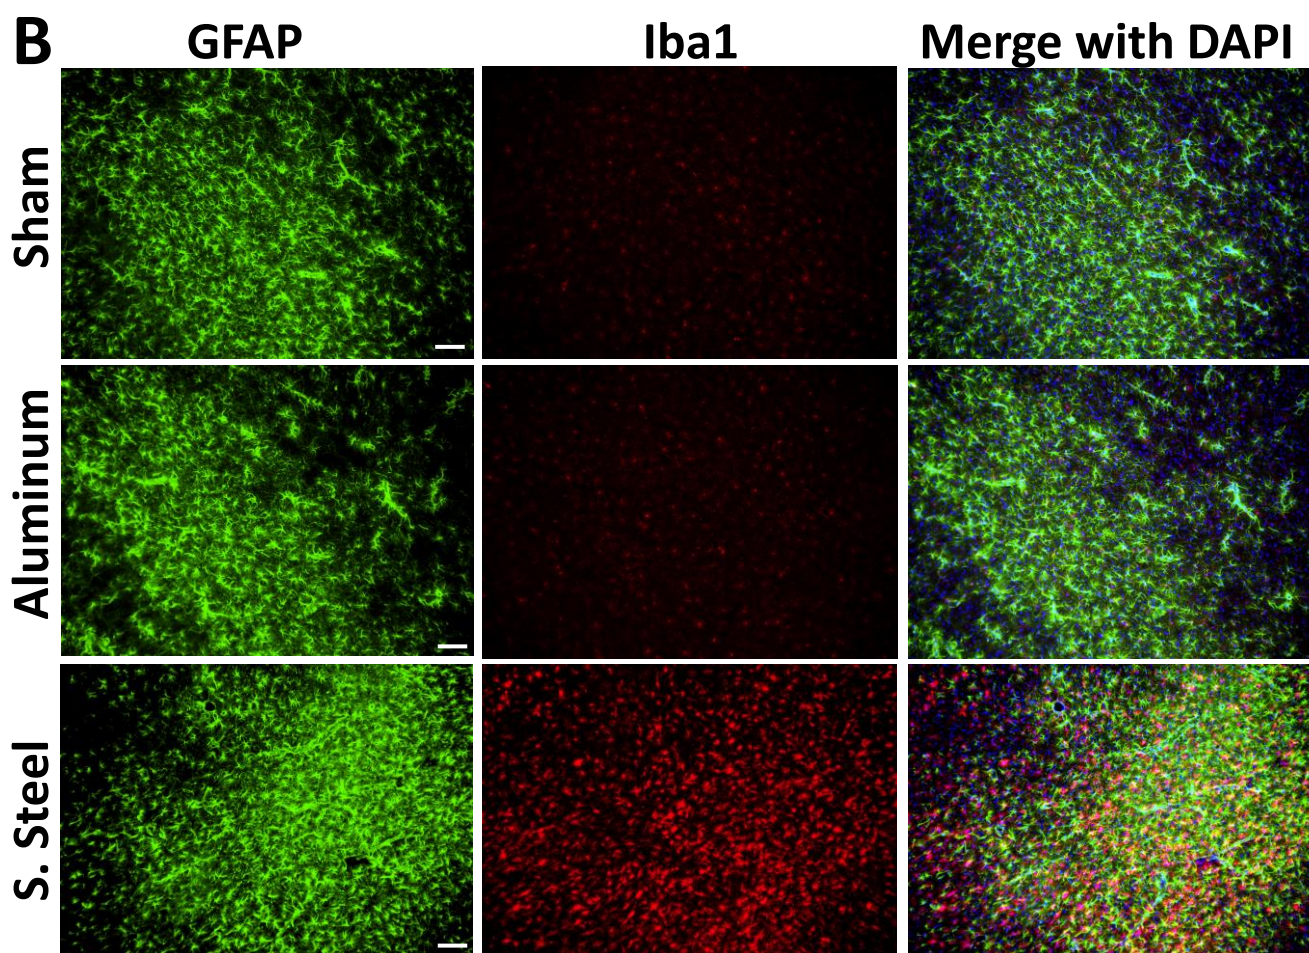

Supplement: s1 [file s1]
